# Supplementary material
Source: publisher figshare collection journal article supplement (https://gsajournals.figshare.com/ndownloader/files/25271234)
Supplement: Supplementary file 1 [file 25271234]

## Sheet: biological process
Category	Term	Count	%	PValue	Genes	List Total	Pop Hits	Pop Total	Fold Enrichment	Bonferroni	Benjamini	FDR
GOTERM_BP_DIRECT	GO:0008652~cellular amino acid biosynthetic process	38	7.07635	3.94e-17	S000006371, S000002341, S000002442, S000002441, S000001378, S000001356, S000003624, S000003152, S000001694, S000005419, S000003607, S000001456, S000005656, S000000452, S000001060, S000000319, S000003891, S000006349, S000005710, S000002289, S000005829, S000003870, S000001473, S000002534, S000002994, S000006194, S000005048, S000000535, S000000892, S000004666, S000000871, S000001921, S000002762, S00…	442	97	5557	4.92527	2.96e-14	2.96e-14	5.99e-14
GOTERM_BP_DIRECT	GO:0006526~arginine biosynthetic process	10	1.8622	5.51e-09	S000005829, S000004666, S000000871, S000003870, S000005419, S000003607, S000005656, S000001060, S000005500, S000003624	442	11	5557	11.4295	4.13e-06	2.07e-06	8.38e-06
GOTERM_BP_DIRECT	GO:0055085~transmembrane transport	47	8.75233	8.72e-09	S000004584, S000005522, S000000308, S000005523, S000000617, S000006396, S000000445, S000001039, S000001814, S000006398, S000006405, S000000062, S000003154, S000005892, S000001671, S000003072, S000001027, S000004340, S000005799, S000005843, S000005718, S000002418, S000005518, S000003699, S000002357, S000005516, S000004938, S000001760, S000005479, S000001428, S000006013, S000005597, S000002814, S00…	442	240	5557	2.46209	6.55e-06	2.18e-06	1.33e-05
GOTERM_BP_DIRECT	GO:0055114~oxidation-reduction process	58	10.8007	4.77e-08	S000000589, S000006371, S000003915, S000001013, S000005218, S000003916, S000000797, S000000239, S000003093, S000000349, S000002243, S000000319, S000003872, S000002534, S000001590, S000001509, S000004281, S000004001, S000004644, S000002426, S000001717, S000004600, S000000460, S000003386, S000000773, S000005646, S000003839, S000003320, S000000194, S000001356, S000003980, S000003488, S000004195, S00…	442	347	5557	2.10144	3.58e-05	8.95e-06	7.26e-05
GOTERM_BP_DIRECT	GO:0009085~lysine biosynthetic process	7	1.30354	3.85e-05	S000000319, S000002289, S000002341, S000001473, S000002441, S000001356, S000002565	442	10	5557	8.80068	0.0285099	0.00576814	0.0586113
GOTERM_BP_DIRECT	GO:0055072~iron ion homeostasis	10	1.8622	0.000274	S000004024, S000004195, S000001039, S000005518, S000001032, S000005512, S000005909, S000005908, S000028523, S000004938	442	29	5557	4.33531	0.18578	0.0336742	0.415727
GOTERM_BP_DIRECT	GO:0000422~mitophagy	11	2.04842	0.000346	S000001520, S000006171, S000001427, S000000174, S000004348, S000006087, S000003148, S000000199, S000004769, S000006389, S000002429	442	36	5557	3.84157	0.228619	0.0364027	0.524764
GOTERM_BP_DIRECT	GO:0006099~tricarboxylic acid cycle	10	1.8622	0.000477	S000000598, S000001945, S000004724, S000006205, S000004154, S000005284, S000005432, S000002224, S000003581, S000005061	442	31	5557	4.05561	0.301325	0.0438316	0.724176
GOTERM_BP_DIRECT	GO:0019878~lysine biosynthetic process via aminoadipic acid	6	1.11732	0.000554	S000000319, S000002289, S000003122, S000002341, S000001473, S000001356	442	10	5557	7.54344	0.340674	0.0452273	0.840755
GOTERM_BP_DIRECT	GO:0006810~transport	89	16.5736	0.00130904	S000005957, S000000731, S000003114, S000004584, S000005522, S000000308, S000005523, S000000445, S000001039, S000000351, S000004070, S000003819, S000003154, S000001671, S000005855, S000001586, S000004340, S000000826, S000000687, S000005718, S000002766, S000005518, S000003191, S000005516, S000001760, S000005479, S000002833, S000003148, S000004142, S000001205, S000005575, S000006389, S000003513, S00…	442	822	5557	1.36125	0.626088	0.0936896	1.97425
GOTERM_BP_DIRECT	GO:0009073~aromatic amino acid family biosynthetic process	6	1.11732	0.00152431	S000001694, S000000892, S000002534, S000002442, S000002994, S000002762	442	12	5557	6.2862	0.681975	0.098908	2.2954
GOTERM_BP_DIRECT	GO:0006592~ornithine biosynthetic process	4	0.744879	0.00186918	S000004666, S000000871, S000003607, S000005500	442	4	5557	12.5724	0.75465	0.110494	2.80786
GOTERM_BP_DIRECT	GO:0046618~drug export	4	0.744879	0.00186918	S000002418, S000002814, S000005679, S000005855	442	4	5557	12.5724	0.75465	0.110494	2.80786
GOTERM_BP_DIRECT	GO:0006094~gluconeogenesis	7	1.30354	0.00268113	S000001805, S000003486, S000000422, S000002179, S000003030, S000004369, S000003588	442	19	5557	4.63194	0.866844	0.143666	4.00445
GOTERM_BP_DIRECT	GO:0006855~drug transmembrane transport	7	1.30354	0.00268113	S000003513, S000004584, S000002418, S000002814, S000000247, S000005679, S000005855	442	19	5557	4.63194	0.866844	0.143666	4.00445
GOTERM_BP_DIRECT	GO:0009086~methionine biosynthetic process	9	1.67598	0.00282903	S000003891, S000006371, S000003093, S000006194, S000001456, S000002565, S000000854, S000003152, S000005425	442	32	5557	3.53599	0.880879	0.140988	4.22094
GOTERM_BP_DIRECT	GO:0000162~tryptophan biosynthetic process	4	0.744879	0.00439768	S000001694, S000000892, S000002994, S000002762	442	5	5557	10.0579	0.963482	0.198013	6.48904
GOTERM_BP_DIRECT	GO:0006541~glutamine metabolic process	7	1.30354	0.00467954	S000001694, S000004689, S000006349, S000005829, S000004701, S000000452, S000001834	442	21	5557	4.1908	0.970477	0.197611	6.89122
GOTERM_BP_DIRECT	GO:0000105~histidine biosynthetic process	5	0.931099	0.0055834	S000000535, S000001921, S000001378, S000000452, S000000857	442	10	5557	6.2862	0.985077	0.219129	8.17005
GOTERM_BP_DIRECT	GO:0042908~xenobiotic transport	5	0.931099	0.0055834	S000003513, S000002418, S000002814, S000005679, S000005855	442	10	5557	6.2862	0.985077	0.219129	8.17005
GOTERM_BP_DIRECT	GO:0006914~autophagy	13	2.42086	0.00578301	S000001520, S000006171, S000000174, S000004348, S000005443, S000005442, S000006087, S000003148, S000004769, S000004303, S000005678, S000006389, S000002429	442	67	5557	2.43942	0.987166	0.214928	8.45025
GOTERM_BP_DIRECT	GO:0006950~response to stress	10	1.8622	0.00775873	S000000026, S000001874, S000000073, S000000987, S000005536, S000004453, S000003948, S000005575, S000001480, S000003445	442	45	5557	2.79387	0.997119	0.264989	11.1809
GOTERM_BP_DIRECT	GO:0034354~'de novo' NAD biosynthetic process from tryptophan	4	0.744879	0.00827939	S000001943, S000003786, S000003839, S000000194	442	6	5557	8.3816	0.998057	0.268154	11.8877
GOTERM_BP_DIRECT	GO:0000050~urea cycle	4	0.744879	0.00827939	S000005829, S000003870, S000005419, S000003624	442	6	5557	8.3816	0.998057	0.268154	11.8877
GOTERM_BP_DIRECT	GO:0044805~late nucleophagy	6	1.11732	0.00854328	S000000174, S000006087, S000003148, S000004769, S000006389, S000002429	442	17	5557	4.43732	0.998409	0.264229	12.2439
GOTERM_BP_DIRECT	GO:0008152~metabolic process	35	6.51769	0.00937508	S000006371, S000000422, S000002179, S000003030, S000001378, S000005218, S000006109, S000001694, S000001361, S000004779, S000001086, S000003192, S000000452, S000004369, S000002416, S000000319, S000004248, S000000767, S000003124, S000002534, S000002994, S000000863, S000005844, S000007242, S000000535, S000003499, S000004666, S000000871, S000000839, S000002762, S000004702, S000000515, S000001252, S00…	442	284	5557	1.54942	0.999153	0.274969	13.358
GOTERM_BP_DIRECT	GO:0034599~cellular response to oxidative stress	14	2.60708	0.00959128	S000000589, S000001318, S000005646, S000004862, S000006109, S000001509, S000002941, S000001363, S000006117, S000003275, S000000250, S000004001, S000004981, S000002861	442	80	5557	2.20017	0.999281	0.269983	13.6454
GOTERM_BP_DIRECT	GO:0009435~NAD biosynthetic process	5	0.931099	0.0115838	S000001943, S000003786, S000003839, S000000194, S000005073	442	12	5557	5.2385	0.999842	0.305521	16.2526
GOTERM_BP_DIRECT	GO:0006879~cellular iron ion homeostasis	9	1.67598	0.0157869	S000006056, S000004024, S000004195, S000001039, S000001814, S000005518, S000001032, S000002357, S000005908	442	42	5557	2.69409	0.999994	0.379991	21.5127
GOTERM_BP_DIRECT	GO:0015891~siderophore transport	4	0.744879	0.0205584	S000001039, S000001032, S000005909, S000005908	442	8	5557	6.2862	1	0.451193	27.1095
GOTERM_BP_DIRECT	GO:0006090~pyruvate metabolic process	5	0.931099	0.0206345	S000005874, S000002788, S000000422, S000003319, S000003030	442	14	5557	4.49014	1	0.440073	27.1957
GOTERM_BP_DIRECT	GO:0035690~cellular response to drug	5	0.931099	0.0206345	S000000139, S000002418, S000002814, S000005679, S000005855	442	14	5557	4.49014	1	0.440073	27.1957
GOTERM_BP_DIRECT	GO:0006121~mitochondrial electron transport, succinate to ubiquinone	4	0.744879	0.0290516	S000004724, S000004154, S000005432, S000003581	442	9	5557	5.58773	1	0.546495	36.16
GOTERM_BP_DIRECT	GO:0061709~reticulophagy	4	0.744879	0.0290516	S000000174, S000003148, S000004303, S000005678	442	9	5557	5.58773	1	0.546495	36.16
GOTERM_BP_DIRECT	GO:1903825~organic acid transmembrane transport	3	0.558659	0.0338527	S000000308, S000006262, S000006405	442	4	5557	9.4293	1	0.590103	40.8
GOTERM_BP_DIRECT	GO:0006569~tryptophan catabolic process	4	0.744879	0.0391094	S000003786, S000002788, S000003319, S000000194	442	10	5557	5.02896	1	0.631642	45.518
GOTERM_BP_DIRECT	GO:0019363~pyridine nucleotide biosynthetic process	4	0.744879	0.0391094	S000001943, S000003786, S000000194, S000005073	442	10	5557	5.02896	1	0.631642	45.518
GOTERM_BP_DIRECT	GO:0006749~glutathione metabolic process	5	0.931099	0.0406229	S000004863, S000001784, S000003433, S000003983, S000003386	442	17	5557	3.69776	1	0.633835	46.8098
GOTERM_BP_DIRECT	GO:0016311~dephosphorylation	10	1.8622	0.0412861	S000004566, S000000839, S000001921, S000003192, S000001086, S000005072, S000004369, S000007242, S000002182, S000005425	442	59	5557	2.13091	1	0.628238	47.3667
GOTERM_BP_DIRECT	GO:0006631~fatty acid metabolic process	7	1.30354	0.0484497	S000000589, S000000826, S000004506, S000000863, S000005844, S000001717, S000005626	442	34	5557	2.58843	1	0.677032	53.0456
GOTERM_BP_DIRECT	GO:0006537~glutamate biosynthetic process	4	0.744879	0.050689	S000000598, S000000058, S000005284, S000002224	442	11	5557	4.57178	1	0.683048	54.6998
GOTERM_BP_DIRECT	GO:0019752~carboxylic acid metabolic process	4	0.744879	0.050689	S000005048, S000002289, S000002341, S000004862	442	11	5557	4.57178	1	0.683048	54.6998
GOTERM_BP_DIRECT	GO:0044718~siderophore transmembrane transport	3	0.558659	0.0534894	S000001039, S000001814, S000001032	442	5	5557	7.54344	1	0.692588	56.6919
GOTERM_BP_DIRECT	GO:0016050~vesicle organization	6	1.11732	0.0662461	S000000077, S000003021, S000005442, S000002833, S000000600, S000001036	442	28	5557	2.69409	1	0.76066	64.7741
GOTERM_BP_DIRECT	GO:0098869~cellular oxidant detoxification	6	1.11732	0.0750732	S000003872, S000001784, S000002861, S000001509, S000003320, S000003386	442	29	5557	2.60119	1	0.79485	69.5163
GOTERM_BP_DIRECT	GO:0042819~vitamin B6 biosynthetic process	3	0.558659	0.0760943	S000004701, S000004702, S000001834	442	6	5557	6.2862	1	0.790737	70.0246
GOTERM_BP_DIRECT	GO:0009102~biotin biosynthetic process	3	0.558659	0.0760943	S000005339, S000005340, S000005341	442	6	5557	6.2862	1	0.790737	70.0246
GOTERM_BP_DIRECT	GO:0008615~pyridoxine biosynthetic process	3	0.558659	0.0760943	S000004701, S000004702, S000000239	442	6	5557	6.2862	1	0.790737	70.0246
GOTERM_BP_DIRECT	GO:0061414~positive regulation of transcription from RNA polymerase II promoter by a nonfermentable carbon source	4	0.744879	0.0781305	S000000101, S000000986, S000004621, S000003625	442	13	5557	3.86843	1	0.791234	71.0146
GOTERM_BP_DIRECT	GO:0042493~response to drug	5	0.931099	0.0796652	S000005175, S000001027, S000002418, S000002814, S000005679	442	21	5557	2.99343	1	0.789582	71.7405
GOTERM_BP_DIRECT	GO:0030476~ascospore wall assembly	8	1.48976	0.0976929	S000001181, S000006258, S000003575, S000003574, S000002533, S000005072, S000000249, S000000247	442	50	5557	2.01158	1	0.847867	79.0888

## Sheet: molecular function
Category	Term	Count	%	PValue	Genes	List Total	Pop Hits	Pop Total	Fold Enrichment	Bonferroni	Benjamini	FDR
GOTERM_MF_DIRECT	GO:0016491~oxidoreductase activity	54	10.0559	2.15979e-09	S000000589, S000006371, S000003915, S000001013, S000005218, S000003916, S000000797, S000000239, S000003093, S000000349, S000002243, S000000319, S000002534, S000001590, S000001509, S000004001, S000004644, S000001717, S000000460, S000004600, S000003386, S000000773, S000005646, S000003839, S000003320, S000000194, S000001356, S000003980, S000003488, S000005078, S000001554, S000000058, S000004779, S00…	383	292	4885	2.35872	1.14685e-06	1.14685e-06	3.13649e-06
GOTERM_MF_DIRECT	GO:0003824~catalytic activity	55	10.2421	6.47556e-07	S000006371, S000002179, S000002341, S000002442, S000004862, S000001864, S000001378, S000001014, S000000797, S000003152, S000000452, S000003251, S000000319, S000004248, S000002289, S000003870, S000002534, S000002994, S000004281, S000005048, S000001943, S000005874, S000004702, S000001717, S000004566, S000000422, S000003030, S000000222, S000001694, S000005699, S000003979, S000003319, S000002788, S00…	383	353	4885	1.98726	0.000343793	0.000171911	0.000940388
GOTERM_MF_DIRECT	GO:0016829~lyase activity	23	4.28305	3.52018e-06	S000001805, S000001701, S000002895, S000006206, S000002534, S000002994, S000004862, S000001834, S000005913, S000003152, S000001694, S000002941, S000000892, S000003486, S000003319, S000002788, S000004701, S000005920, S000004702, S000000452, S000001060, S000004981, S000001717	383	97	4885	3.02428	0.00186747	0.000622879	0.00511195
GOTERM_MF_DIRECT	GO:0016740~transferase activity	85	15.8287	1.17962e-05	S000004863, S000002341, S000002442, S000001378, S000001864, S000002301, S000003015, S000003624, S000002723, S000000826, S000003426, S000000687, S000002373, S000000452, S000003251, S000003109, S000002532, S000001766, S000004229, S000004248, S000000598, S000002289, S000006205, S000002534, S000004089, S000006194, S000002533, S000003148, S000004710, S000005866, S000001491, S000002183, S000005048, S00…	383	694	4885	1.56216	0.00624425	0.00156473	0.0171293
GOTERM_MF_DIRECT	GO:0008483~transaminase activity	9	1.67598	4.55534e-05	S000004689, S000005710, S000001378, S000001864, S000005341, S000003251, S000005500, S000002426, S000001179	383	19	4885	6.04164	0.0238992	0.00482619	0.066133
GOTERM_MF_DIRECT	GO:0046912~transferase activity, transferring acyl groups, acyl groups converted into alkyl on transfer	6	1.11732	0.000275782	S000005048, S000000598, S000002289, S000006205, S000002341, S000005284	383	9	4885	8.50305	0.13624	0.0241145	0.399749
GOTERM_MF_DIRECT	GO:0005215~transporter activity	17	3.16574	0.00064822	S000000617, S000000445, S000006396, S000005479, S000001428, S000005597, S000003154, S000000062, S000004024, S000005069, S000005799, S000005718, S000005748, S000005355, S000002212, S000002404, S000005516	383	84	4885	2.58128	0.291295	0.0479979	0.937242
GOTERM_MF_DIRECT	GO:0008559~xenobiotic-transporting ATPase activity	5	0.931099	0.00528669	S000003513, S000002418, S000002814, S000005679, S000005855	383	10	4885	6.37728	0.940076	0.296604	7.40897
GOTERM_MF_DIRECT	GO:0030170~pyridoxal phosphate binding	10	1.8622	0.006024	S000003891, S000001701, S000002994, S000004862, S000001378, S000005341, S000003251, S000005500, S000001179, S000003152	383	44	4885	2.89877	0.95958	0.299871	8.40067
GOTERM_MF_DIRECT	GO:0022857~transmembrane transporter activity	10	1.8622	0.00702494	S000005339, S000005522, S000003072, S000005523, S000000445, S000001428, S000005355, S000000062, S000002404, S000005516	383	45	4885	2.83435	0.976327	0.312257	9.73112
GOTERM_MF_DIRECT	GO:0000287~magnesium ion binding	13	2.42086	0.0073192	S000003122, S000007242, S000001356, S000005425, S000005874, S000003486, S000003319, S000002788, S000005920, S000005340, S000001086, S000002224, S000000857	383	70	4885	2.36871	0.979774	0.298558	10.1188
GOTERM_MF_DIRECT	GO:0004364~glutathione transferase activity	5	0.931099	0.00780125	S000004863, S000001784, S000003433, S000003983, S000003386	383	11	4885	5.79753	0.984372	0.292883	10.7506
GOTERM_MF_DIRECT	GO:0004359~glutaminase activity	4	0.744879	0.00793667	S000004701, S000004702, S000000452, S000001834	383	6	4885	8.50305	0.985465	0.277816	10.9273
GOTERM_MF_DIRECT	GO:0042626~ATPase activity, coupled to transmembrane movement of substances	7	1.30354	0.00880694	S000003513, S000001027, S000002418, S000002814, S000005679, S000001671, S000005855	383	24	4885	3.72008	0.990879	0.28503	12.0553
GOTERM_MF_DIRECT	GO:0004042~acetyl-CoA:L-glutamate N-acetyltransferase activity	3	0.558659	0.0173513	S000004666, S000000871, S000003607	383	3	4885	12.7546	0.999908	0.461855	22.4456
GOTERM_MF_DIRECT	GO:0004108~citrate (Si)-synthase activity	3	0.558659	0.0173513	S000000598, S000006205, S000005284	383	3	4885	12.7546	0.999908	0.461855	22.4456
GOTERM_MF_DIRECT	GO:0051287~NAD binding	7	1.30354	0.0189107	S000000535, S000000871, S000002224, S000005218, S000001356, S000003588, S000002565	383	28	4885	3.18864	0.99996	0.469328	24.2139
GOTERM_MF_DIRECT	GO:0051213~dioxygenase activity	4	0.744879	0.0197447	S000003786, S000001013, S000003839, S000003980	383	8	4885	6.37728	0.999975	0.463613	25.144
GOTERM_MF_DIRECT	GO:0015297~antiporter activity	8	1.48976	0.0293102	S000005339, S000005214, S000003951, S000004340, S000005799, S000001814, S000006405, S000000336	383	39	4885	2.61632	1	0.584211	35.0798
GOTERM_MF_DIRECT	GO:0005342~organic acid transmembrane transporter activity	3	0.558659	0.0329143	S000000308, S000006262, S000006405	383	4	4885	9.56593	1	0.60755	38.4937
GOTERM_MF_DIRECT	GO:0015343~siderophore transmembrane transporter activity	3	0.558659	0.0329143	S000001039, S000001814, S000001032	383	4	4885	9.56593	1	0.60755	38.4937
GOTERM_MF_DIRECT	GO:0016616~oxidoreductase activity, acting on the CH-OH group of donors, NAD or NADP as acceptor	6	1.11732	0.0350601	S000005511, S000000057, S000002224, S000005218, S000001356, S000001717	383	24	4885	3.18864	1	0.612313	40.4461
GOTERM_MF_DIRECT	GO:0000978~RNA polymerase II core promoter proximal region sequence-specific DNA binding	12	2.23464	0.0356766	S000000101, S000001363, S000000703, S000005183, S000004256, S000000986, S000002178, S000002441, S000002329, S000000842, S000004621, S000003625	383	77	4885	1.98773	1	0.60092	40.9963
GOTERM_MF_DIRECT	GO:0016810~hydrolase activity, acting on carbon-nitrogen (but not peptide) bonds	4	0.744879	0.0488172	S000003749, S000001426, S000001427, S000001466	383	11	4885	4.63803	1	0.701206	51.6556
GOTERM_MF_DIRECT	GO:0000981~RNA polymerase II transcription factor activity, sequence-specific DNA binding	12	2.23464	0.0490491	S000000101, S000001363, S000000703, S000004256, S000000986, S000002441, S000002329, S000004621, S000001457, S000000199, S000003625, S000003520	383	81	4885	1.88957	1	0.686861	51.8265
GOTERM_MF_DIRECT	GO:0016301~kinase activity	24	4.46927	0.0526078	S000003677, S000003027, S000000767, S000002534, S000006109, S000003148, S000004710, S000002723, S000002183, S000005874, S000006258, S000000871, S000000687, S000003426, S000003642, S000002373, S000004905, S000003593, S000002416, S000002939, S000003700, S000005073, S000000854, S000006315	383	207	4885	1.47879	1	0.697502	54.3793
GOTERM_MF_DIRECT	GO:0005199~structural constituent of cell wall	8	1.48976	0.0580196	S000001646, S000001874, S000000073, S000005536, S000004453, S000003948, S000001480, S000003696	383	45	4885	2.26748	1	0.719037	58.021
GOTERM_MF_DIRECT	GO:0034450~ubiquitin-ubiquitin ligase activity	3	0.558659	0.0741058	S000005351, S000003109, S000005352	383	6	4885	6.37728	1	0.79247	67.3112
GOTERM_MF_DIRECT	GO:0036381~pyridoxal 5'-phosphate synthase (glutamine hydrolysing) activity	3	0.558659	0.0741058	S000004701, S000004702, S000001834	383	6	4885	6.37728	1	0.79247	67.3112
GOTERM_MF_DIRECT	GO:0046983~protein dimerization activity	5	0.931099	0.0877059	S000005524, S000000871, S000000199, S000002565, S000004645	383	22	4885	2.89877	1	0.835568	73.6324
GOTERM_MF_DIRECT	GO:0043565~sequence-specific DNA binding	19	3.53818	0.091669	S000000572, S000000703, S000006219, S000004256, S000002441, S000002178, S000005258, S000000199, S000003625, S000001181, S000001363, S000000986, S000006151, S000002329, S000001456, S000000842, S000001457, S000004621, S000003064	383	165	4885	1.46871	1	0.838516	75.2478
GOTERM_MF_DIRECT	GO:0001077~transcriptional activator activity, RNA polymerase II core promoter proximal region sequence-specific binding	9	1.67598	0.0932968	S000000101, S000001363, S000004256, S000000986, S000002178, S000002441, S000002329, S000004621, S000003625	383	60	4885	1.91319	1	0.833593	75.8842
GOTERM_MF_DIRECT	GO:0008028~monocarboxylic acid transmembrane transporter activity	3	0.558659	0.098512	S000005069, S000005479, S000002212	383	7	4885	5.46624	1	0.840489	77.8221
GOTERM_MF_DIRECT	GO:0018456~aryl-alcohol dehydrogenase (NAD+) activity	3	0.558659	0.098512	S000003916, S000000704, S000006009	383	7	4885	5.46624	1	0.840489	77.8221

## Sheet: cellular component
Category	Term	Count	%	PValue	Genes	List Total	Pop Hits	Pop Total	Fold Enrichment	Bonferroni	Benjamini	FDR
GOTERM_CC_DIRECT	GO:0000324~fungal-type vacuole	43	8.00745	5.472e-05	S000087203, S000003668, S000003574, S000001039, S000005285, S000001032, S000001379, S000006398, S000001480, S000003154, S000005855, S000001034, S000001586, S000006044, S000003486, S000005223, S000003429, S000005843, S000005718, S000001361, S000005518, S000005536, S000003696, S000005073, S000004938, S000004964, S000005349, S000001874, S000001428, S000005413, S000003000, S000003948, S000000600, S00…	469	284	5861	1.89212	0.0101807	0.0101807	0.0678093
GOTERM_CC_DIRECT	GO:0016021~integral component of membrane	140	26.0708	0.000128268	S000004584, S000005522, S000005523, S000003248, S000003668, S000001534, S000000351, S000004070, S000007523, S000003154, S000001291, S000000077, S000005223, S000005712, S000005718, S000005518, S000113555, S000000488, S000005516, S000002533, S000001349, S000004303, S000001205, S000001491, S000003513, S000028805, S000028526, S000003475, S000000696, S000000697, S000000698, S000001351, S000004600, S00…	469	1326	5861	1.31942	0.0237022	0.0119222	0.158884
GOTERM_CC_DIRECT	GO:0071944~cell periphery	39	7.26257	0.000408764	S000005957, S000003834, S000004584, S000087203, S000007234, S000003227, S000001814, S000001534, S000001032, S000000062, S000005855, S000005175, S000006112, S000003429, S000005799, S000005718, S000002418, S000005536, S000005518, S000005516, S000004938, S000000869, S000005479, S000001428, S000006013, S000002814, S000000600, S000005575, S000000247, S000005679, S000002182, S000003513, S000003363, S00…	469	272	5861	1.79182	0.0736049	0.0251628	0.505522
GOTERM_CC_DIRECT	GO:0005886~plasma membrane	59	10.987	0.00078718	S000005957, S000004584, S000087203, S000001039, S000001534, S000003154, S000003819, S000005855, S000000077, S000005223, S000003429, S000000687, S000005718, S000001478, S000005518, S000005516, S000005575, S000001204, S000003513, S000000987, S000001257, S000005339, S000000773, S000006396, S000001814, S000005285, S000001032, S000006398, S000006405, S000001036, S000003488, S000005175, S000003486, S00…	469	482	5861	1.52969	0.136931	0.0361457	0.971418
GOTERM_CC_DIRECT	GO:0016020~membrane	168	31.2849	0.00195952	S000004584, S000005522, S000005523, S000003248, S000003668, S000000898, S000001534, S000000351, S000004070, S000003154, S000007523, S000001291, S000000077, S000005223, S000005712, S000001478, S000005718, S000113555, S000005518, S000000488, S000005516, S000001349, S000002533, S000003148, S000004303, S000001205, S000001204, S000001491, S000003471, S000003513, S000028805, S000028526, S000003475, S00…	469	1738	5861	1.20798	0.307045	0.070732	2.40208
GOTERM_CC_DIRECT	GO:0005739~mitochondrion	116	21.6015	0.0106951	S000002341, S000001013, S000005913, S000005218, S000000351, S000004271, S000113555, S000003251, S000002532, S000003872, S000002289, S000006206, S000006205, S000001349, S000005432, S000001205, S000002477, S000005144, S000004281, S000028805, S000001945, S000003475, S000028526, S000003342, S000003240, S000004183, S000005626, S000000773, S000002465, S000005285, S000005284, S000003983, S000028522, S00…	469	1189	5861	1.2192	0.866112	0.284752	12.4788
GOTERM_CC_DIRECT	GO:0034045~pre-autophagosomal structure membrane	7	1.30354	0.0119994	S000006171, S000005443, S000005442, S000003148, S000004769, S000004303, S000005678	469	25	5861	3.4991	0.895384	0.27566	13.8985
GOTERM_CC_DIRECT	GO:0000421~autophagosome membrane	3	0.558659	0.0180781	S000000174, S000003148, S000004769	469	3	5861	12.4968	0.96701	0.347173	20.2398
GOTERM_CC_DIRECT	GO:1903600~glutaminase complex	3	0.558659	0.0342523	S000004701, S000004702, S000001834	469	4	5861	9.3726	0.998523	0.515269	35.0811
GOTERM_CC_DIRECT	GO:0005777~peroxisome	12	2.23464	0.040853	S000003471, S000003872, S000000598, S000004506, S000001351, S000006398, S000005061, S000003320, S000001717, S000001671, S000003386, S000003152	469	77	5861	1.94755	0.99959	0.541591	40.372
GOTERM_CC_DIRECT	GO:0000407~pre-autophagosomal structure	7	1.30354	0.0497131	S000000174, S000005442, S000006087, S000003148, S000004769, S000006389, S000002429	469	34	5861	2.57287	0.999928	0.579728	46.8517
GOTERM_CC_DIRECT	GO:0031966~mitochondrial membrane	10	1.8622	0.055968	S000001520, S000003834, S000003072, S000003475, S000005843, S000004348, S000001349, S000000351, S000000194, S000003697	469	62	5861	2.01561	0.999979	0.592423	51.0292
GOTERM_CC_DIRECT	GO:0016023~cytoplasmic, membrane-bounded vesicle	3	0.558659	0.0769398	S000003298, S000000731, S000001032	469	6	5861	6.2484	1	0.683883	62.9324
